# Supplementary material for: Controlling the ON/OFF threading of a terpyridine containing [2]pseudorotaxane ligand via changes in coordination geometry
Source: Royal Society of Chemistry journal article supplement (doi:10.1039/b716117d), 2007-11-22
Supplement: b716117d.pdf [file b716117d.pdf]

Electronic Supplementary Information for:

**Controlling the ON/OFF threading of a terpyridine containing [2]pseudorotaxane ligand via changes in coordination geometry**

**Sapna Sharma, Gregory J. E. Davidson, and Stephen J. Loeb\***

**General Methods:** Dibenzo-24-crown-8, was obtained from Aldrich and used as received. MeCN was dried using an Innovative Technologies Solvent Purification System. 1-Bromo-2-(4,4'-dipyridinium)ethane tetrafluoroborate,<sup>1</sup> 4'-(4"-pyridyl)-2,2':6',2"-terpyridine,<sup>2</sup> 24-crown-8<sup>3</sup> and dinaphtho-24-crown-8<sup>3</sup> were synthesized using literature methods. Thin layer chromatography (TLC) was performed on Merck Silica gel 60 F<sub>254</sub> plates and viewed under UV light. Column chromatography was performed using Silicycle Ultra Pure Silica Gel (230 - 400 mesh). <sup>1</sup>H NMR spectra were obtained on a Bruker Avance 500 instrument operating at 500.1 MHz (using deuterated solvent as the lock and residual solvent or tetramethylsilane as the internal reference). Conventional 2-D NMR (<sup>1</sup>H-<sup>1</sup>H COSY and NOESY) were used to assign all peaks. Deuterated solvents were purchased from Cambridge Isotope Laboratories Inc. and used as received. Mass spectra were recorded in a 1:1 MeCN/H<sub>2</sub>O solution on a Micromass LCT electrospray mass spectrometer.

**Preparation of Ligand [1][BF<sub>4</sub>]<sub>3</sub>:** One equivalent of 4-(4-pyridyl)-pyridinium-ethyl-4'-4(4-pyridinium)-2,2':6',2"-terpyridine tetrafluoroborate and five equivalents of benzylbromide were dissolved in MeCN and stirred at room temperature for 72 h. The solution was filtered and the solid washed with excess of CHCl<sub>3</sub> to remove any excess benzylbromide. The solid was combined with saturated aqueous NaBF<sub>4</sub> solution and stirred for 1 h and then filtered to yield [1][BF<sub>4</sub>]<sub>3</sub> (20%). HR ESI-MS: m/z calculated for {[1][BF<sub>4</sub>]}<sup>+</sup> 759.2825, found 759.2817. <sup>1</sup>H NMR (500 MHz, d<sup>3</sup>-MeCN)

<sup>1</sup>H NMR (500 MHz, d<sup>3</sup>-MeCN)

| Proton | δ(ppm) | Multiplicity | # of Protons | Coupling Constant (Hz)                                                                              |
|--------|--------|--------------|--------------|-----------------------------------------------------------------------------------------------------|
| a      | 8.77   | m            | 2            | ---                                                                                                 |
| b      | 7.54   | ddd          | 2            | ---                                                                                                 |
| c      | 8.06   | ddd          | 2            | <sup>3</sup> J <sub>cb</sub> ≈ <sup>3</sup> J <sub>cd</sub> = 7.6, <sup>4</sup> J <sub>ca</sub> ≈ 0 |
| d      | 8.77   | m            | 2            | <sup>3</sup> J <sub>dc</sub> = 7.9                                                                  |
| e      | 8.92   | s            | 2            | ---                                                                                                 |
| f      | 8.58   | d            | 2            | <sup>3</sup> J <sub>fg</sub> = 6.8                                                                  |
| g      | 8.83   | d            | 2            | <sup>3</sup> J <sub>gf</sub> = 6.8                                                                  |
| h      | 5.26   | m            | 2            | ---                                                                                                 |
| i      | 5.26   | m            | 2            | ---                                                                                                 |
| j      | 9.01   | d            | 2            | <sup>3</sup> J <sub>jk</sub> = 6.8                                                                  |
| k      | 8.42   | d            | 2            | <sup>3</sup> J <sub>kj</sub> = 6.8                                                                  |
| l      | 8.47   | d            | 2            | <sup>3</sup> J <sub>lm</sub> = 6.8                                                                  |
| m      | 8.91   | d            | 2            | <sup>3</sup> J <sub>ml</sub> = 6.8                                                                  |
| n      | 5.85   | s            | 2            | ---                                                                                                 |
| o      | 7.54   | s            | 2            | ---                                                                                                 |
| p      | 7.54   | s            | 2            | ---                                                                                                 |
| q      | 7.54   | s            | 1            | ---                                                                                                 |

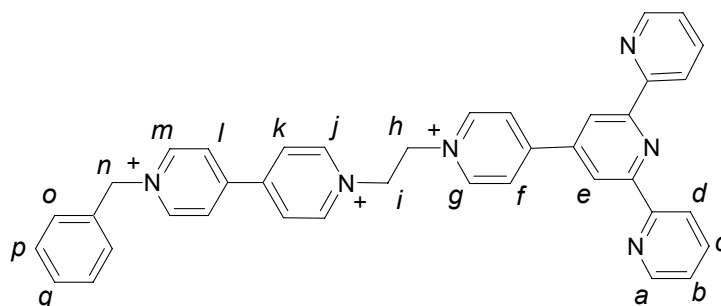



**Preparation of Complex [PtMe(1)][BF<sub>4</sub>]<sub>4</sub>:** A solution of *trans*-[PtMeCl(Me<sub>2</sub>S)<sub>2</sub>] (0.025 g, 0.070 mmol) in MeOH (5 mL) was added dropwise over 5 min to a solution of [Ag][BF<sub>4</sub>] (0.014 g, 0.070 mmol) in MeOH (10 mL) and the resulting solution was stirred at room temperature for 1 h. 1[BF<sub>4</sub>]<sub>3</sub> (0.059 g, 0.070 mmol) was then added and the solution refluxed at 50 °C for 24 h. The solution was cooled and filtered through Celite to remove AgCl(s). The filtrate was evaporated and then dissolved in CHCl<sub>3</sub> (2 mL). Upon standing at room temperature a precipitate formed and [PtMe(1)][BF<sub>4</sub>]<sub>4</sub> collected by vacuum filtration as an orange solid (0.030 g, 38%).

<sup>1</sup>H NMR (500MHz, MeCN-*d*<sub>3</sub>)

| Proton    | δ(ppm) | Multiplicity | # of Protons | Coupling Constant (Hz)                                                                                |
|-----------|--------|--------------|--------------|-------------------------------------------------------------------------------------------------------|
| <b>a</b>  | 8.61   | d            | 2            | ---                                                                                                   |
| <b>b</b>  | 7.78   | ddd          | 2            | <sup>3</sup> J <sub>ba</sub> ≈ <sup>3</sup> J <sub>bc</sub> = 6.2, <sup>4</sup> J <sub>bd</sub> ≈ 1.3 |
| <b>c</b>  | 8.32   | ddd          | 2            | ---                                                                                                   |
| <b>d</b>  | 8.39   | d            | 2            | <sup>3</sup> J <sub>dc</sub> = 7.9                                                                    |
| <b>e</b>  | 8.65   | s            | 2            | ---                                                                                                   |
| <b>f</b>  | 8.42   | m            | 2            | <sup>3</sup> J <sub>fg</sub> = 6.9                                                                    |
| <b>g</b>  | 8.92   | m            | 2            | ---                                                                                                   |
| <b>h</b>  | 5.2    | m            | 2            | ---                                                                                                   |
| <b>i</b>  | 5.2    | m            | 2            | ---                                                                                                   |
| <b>j</b>  | 8.92   | m            | 2            | ---                                                                                                   |
| <b>k</b>  | 8.34   | d            | 2            | ---                                                                                                   |
| <b>l</b>  | 8.37   | d            | 2            | ---                                                                                                   |
| <b>m</b>  | 8.57   | d            | 2            | <sup>3</sup> J <sub>ml</sub> = 6.8                                                                    |
| <b>n</b>  | 5.76   | s            | 2            | ---                                                                                                   |
| <b>o</b>  | 7.44   | s            | 2            | ---                                                                                                   |
| <b>p</b>  | 7.44   | s            | 2            | ---                                                                                                   |
| <b>q</b>  | 7.44   | s            | 1            | ---                                                                                                   |
| <b>a'</b> | 1.31   | s            | 3            | <sup>2</sup> J <sub>a'Pt</sub> = 62                                                                   |

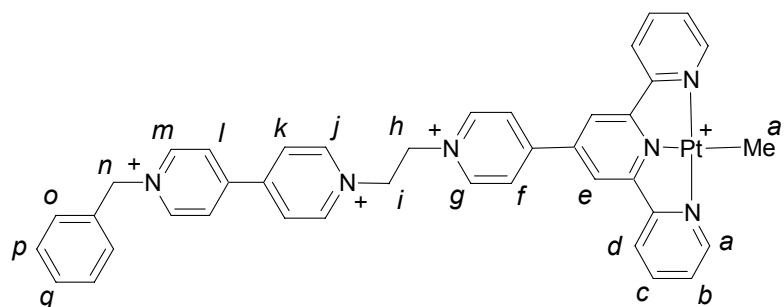

**Preparation of Complex [Ag(MeCN)(1)][BF<sub>4</sub>]<sub>4</sub>:** A solution of 1[BF<sub>4</sub>]<sub>3</sub> (0.025 g, 0.030 mmol) dissolved in MeCN (5 mL) and [Ag][BF<sub>4</sub>] (0.007 g, 0.037 mmol) added with stirring. After 1 h at room temperature the greenish solution was filtered and *isopropyl* ether added. The resulting off-white solid was collected by vacuum filtration (0.010 g, 30%).

<sup>1</sup>H NMR (500MHz, MeCN-*d*<sub>3</sub>)

| Proton | δ(ppm) | Multiplicity | # of Protons | Coupling Constant (Hz)                                                                                |
|--------|--------|--------------|--------------|-------------------------------------------------------------------------------------------------------|
| a      | 8.71   | d            | 2            | <sup>3</sup> J <sub>ab</sub> 4.6                                                                      |
| b      | 7.55   | ddd          | 2            | <sup>3</sup> J <sub>ba</sub> ≈ <sup>3</sup> J <sub>bc</sub> = 6, <sup>4</sup> J <sub>bd</sub> ≈ 1.9   |
| c      | 8.02   | ddd          | 2            | <sup>3</sup> J <sub>cb</sub> ≈ <sup>3</sup> J <sub>cd</sub> = 7.8, <sup>4</sup> J <sub>ca</sub> ≈ 1.7 |
| d      | 8.35   | d            | 2            | <sup>3</sup> J <sub>dc</sub> = 7.9                                                                    |
| e      | 8.72   | s            | 2            | ---                                                                                                   |
| f      | 8.55   | m            | 2            | <sup>3</sup> J <sub>fg</sub> = 6.7                                                                    |
| g      | 8.88   | d            | 2            | <sup>3</sup> J <sub>gf</sub> = 6.7                                                                    |
| h      | 5.2    | m            | 2            | ---                                                                                                   |
| i      | 5.2    | m            | 2            | ---                                                                                                   |
| j      | 8.90   | d            | 2            | <sup>3</sup> J <sub>jk</sub> = 6.8                                                                    |
| k      | 8.35   | d            | 2            | <sup>3</sup> J <sub>kj</sub> = 6.8                                                                    |
| l      | 8.40   | d            | 2            | <sup>3</sup> J <sub>lm</sub> = 6.8                                                                    |
| m      | 8.83   | d            | 2            | <sup>3</sup> J <sub>ml</sub> = 6.8                                                                    |
| n      | 5.75   | s            | 2            | ---                                                                                                   |
| o      | 7.44   | s            | 2            | ---                                                                                                   |
| p      | 7.44   | s            | 2            | ---                                                                                                   |
| q      | 7.44   | s            | 1            | ---                                                                                                   |
| a'     | 2.0    | s            | 3            | ---                                                                                                   |

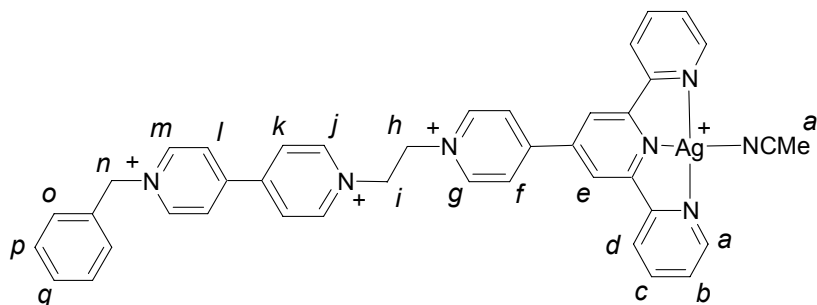

**Preparation of Complex [Cd(1)<sub>2</sub>][BF<sub>4</sub>]<sub>8</sub>:** [Cd(H<sub>2</sub>O)<sub>6</sub>][BF<sub>4</sub>]<sub>2</sub> (0.10 g, 0.025 mmol) and 1[BF<sub>4</sub>]<sub>3</sub> (0.42 g, 0.050 mmol) were combined in 1:1 MeOH/MeCN solution (1 mL) and stirred for 1 h at room temperature. The addition of diethyl ether induced precipitation of the complex which was collected by vacuum filtration as an off-white solid (0.030 g, 60%).

<sup>1</sup>H NMR (500MHz, MeCN-*d*<sub>3</sub>)

| Proton | δ(ppm) | Multiplicity | # of Protons | Coupling Constant (Hz)                                                                                |
|--------|--------|--------------|--------------|-------------------------------------------------------------------------------------------------------|
| a      | 8.66   | d            | 2            | ---                                                                                                   |
| b      | 7.64   | ddd          | 2            | <sup>3</sup> J <sub>ba</sub> ≈ <sup>3</sup> J <sub>bc</sub> = 5.9, <sup>4</sup> J <sub>bd</sub> ≈ 1.7 |
| c      | 8.13   | ddd          | 2            | <sup>3</sup> J <sub>cb</sub> ≈ <sup>3</sup> J <sub>cd</sub> = 7.5, <sup>4</sup> J <sub>ca</sub> ≈ 0   |
| d      | 8.64   | d            | 2            | ---                                                                                                   |
| e      | 8.68   | s            | 2            | ---                                                                                                   |
| f      | 8.54   | m            | 2            | ---                                                                                                   |
| g      | 9.02   | m            | 2            | ---                                                                                                   |
| h      | 5.3    | s            | 2            | ---                                                                                                   |
| i      | 5.3    | s            | 2            | ---                                                                                                   |
| j      | 9.0    | m            | 2            | ---                                                                                                   |
| k      | 8.54   | m            | 2            | ---                                                                                                   |
| l      | 8.54   | d            | 2            | <sup>3</sup> J <sub>lm</sub> = 6.8                                                                    |
| m      | 8.98   | m            | 2            | ---                                                                                                   |
| n      | 5.8    | s            | 2            | ---                                                                                                   |
| o      | 7.5    | s            | 2            | ---                                                                                                   |
| p      | 7.5    | s            | 2            | ---                                                                                                   |
| q      | 7.5    | s            | 1            | ---                                                                                                   |

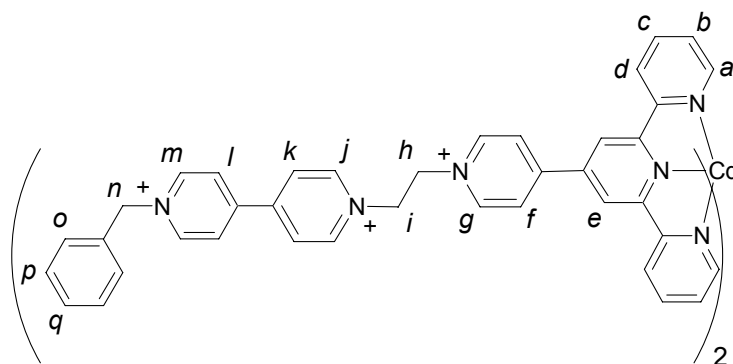

## References

1. G. J. E. Davidson and S. J. Loeb, *Dalton Trans.*, 2003, 4319.
2. E. C. Constable and A. M. W. Cargill Thompson, *J. Chem. Soc., Dalton Trans.*, 1992, 2947.
3. (a) C. J. Pedersen, *J. Am. Chem. Soc.*, 1967, **89**, 7017. (b) D. N. Reinhoudt, F. De Jong and H. P. M. Tomassen, *Tetrahedron Lett.*, 1979, **22**, 2067.
